# Supplementary material
Source: MDPI journal article supplement (https://www.mdpi.com/2073-4441/15/7/1396)
Supplement: s1 [file s1]

Archive with 2 entries (2 files):
- water-2218487-supplementary-Figure.pdf
- water-2218487-supplementary-Table.pdf
