# Supplementary material
Source: MDPI journal article supplement (https://www.mdpi.com/2073-4441/15/7/1396)
Supplement: s1 [file s1]

Table S1. Irrigation Quota of Main Crops in Northwest Arid Area

| Region                           | Crops       | Irrigation methods                  | Irrigation amount (m³/ha) | Region                           | Crops    | Irrigation methods      | Irrigation amount (m³/ha) |
|----------------------------------|-------------|-------------------------------------|---------------------------|----------------------------------|----------|-------------------------|---------------------------|
| Inner Mongolia Autonomous Region | Rice        | Conventional Irrigation             | 9435~10170                | Xinjiang Uygur Autonomous Region | Rice     | Conventional Irrigation | 11550~14850               |
|                                  | Wheat       | Seepage-Preventing Ditch Irrigation | 1710~3585                 |                                  |          | Irrigation on Film      | 9225~12675                |
|                                  |             | Pipe Irrigation                     | 1485~3255                 |                                  | Wheat    | Conventional Irrigation | 4275~5775                 |
|                                  |             | Sprinkler Irrigation                | 1530~3255                 |                                  |          | Irrigation on Film      | 3675~4950                 |
|                                  | Maize       | Seepage-Preventing Ditch Irrigation | 1875~3585                 |                                  |          | Sprinkler Irrigation    | 3300~4425                 |
|                                  |             | Pipe Irrigation                     | 1770~3435                 |                                  | Maize    | Micro-Irrigation        | 3075~4875                 |
|                                  |             | Sprinkler Irrigation                | 1785~3255                 |                                  |          | Conventional Irrigation | 4275~6900                 |
|                                  | Beans       | Seepage-Preventing Ditch Irrigation | 1545~2595                 |                                  |          | Irrigation on Film      | 3675~5850                 |
|                                  |             | Pipe Irrigation                     | 1485~2415                 |                                  | Cotton   | Sprinkler Irrigation    | 3225~5100                 |
|                                  |             | Sprinkler Irrigation                | 1530~2370                 |                                  |          | Micro-Irrigation        | 3075~4875                 |
|                                  | Potatoes    | Pipe Irrigation                     | 1395~3315                 |                                  |          | Conventional Irrigation | 5550~7125                 |
|                                  |             | Sprinkler Irrigation                | 1215~3255                 |                                  | Beans    | Irrigation on Film      | 4725~6075                 |
|                                  | Fruit trees | Border irrigation                   | 2625~4710                 |                                  |          | Sprinkler Irrigation    | 4125~5400                 |
|                                  |             | Drip irrigation                     | 2505~3840                 |                                  |          | Micro-Irrigation        | 3900~4950                 |
|                                  |             | Pipe Irrigation                     | 4185~4875                 |                                  | Potatoes | Conventional Irrigation | 4200~6450                 |
| Ningxia Hui Autonomous Region    | Rice        | Conventional Irrigation             | 15000~15750               |                                  |          | Irrigation on Film      | 3675~5475                 |
|                                  |             | Water-Saving Irrigation             | 11800~12450               |                                  |          | Sprinkler Irrigation    | 3150~4875                 |
|                                  | Wheat       | Border irrigation                   | 2625~4650                 |                                  |          | Micro-Irrigation        | 3000~4500                 |
|                                  | Maize       | Border irrigation                   | 2400~4350                 |                                  | Potatoes | Conventional Irrigation | 3900~5550                 |
|                                  |             | Furrow Irrigation                   | 1875~3300                 |                                  |          | Irrigation on Film      | 3300~4725                 |

|                      |                      |                         |                         |                  |                         |                         |                         |
|----------------------|----------------------|-------------------------|-------------------------|------------------|-------------------------|-------------------------|-------------------------|
|                      |                      | Drip irrigation         | 1500~3150               |                  |                         | Sprinkler Irrigation    | 2925~4125               |
|                      | Potatoes             | Furrow Irrigation       | 1200~2400               |                  |                         | Micro-Irrigation        | 2775~3900               |
|                      |                      | Drip irrigation         | 1425~1500               |                  | Fruit trees             | Conventional Irrigation | 4650~8775               |
|                      |                      | Sprinkler Irrigation    | 1800                    |                  |                         | Irrigation on Film      | 5250~7425               |
|                      | Fruit trees          | Border irrigation       | 3000~4500               |                  |                         | Sprinkler Irrigation    | 4650~6525               |
|                      |                      | Furrow Irrigation       | 2400~5250               |                  | Micro-Irrigation        | 4325~6150               |                         |
|                      |                      | Drip irrigation         | 1350~4200               |                  |                         | Rice                    | Conventional Irrigation |
|                      | Qinghai Province     | Wheat                   | Conventional Irrigation |                  |                         |                         | 2475~4950               |
| Sprinkler Irrigation |                      |                         | 2100~4215               | Micro-Irrigation |                         |                         | 6285~9855               |
| Micro-Irrigation     |                      |                         | 1860~3720               | Wheat            |                         | Conventional Irrigation | 1575~6450               |
| Maize                |                      | Conventional Irrigation | 2700~4950               |                  |                         | Sprinkler Irrigation    | 1125~4575               |
|                      |                      | Sprinkler Irrigation    | 2295~4215               |                  |                         | Micro-Irrigation        | 1050~4320               |
|                      |                      | Micro-Irrigation        | 2025~3720               | Maize            |                         | Conventional Irrigation | 1050~6600               |
| Beans                |                      | Conventional Irrigation | 2250~4050               |                  |                         | Sprinkler Irrigation    | 750~4680                |
|                      |                      | Sprinkler Irrigation    | 1920~3450               |                  | Micro-Irrigation        | 705~4425                |                         |
|                      | Shaanxi Province     | Beans                   | Micro-Irrigation        | 1695~3045        | Beans                   | Conventional Irrigation | 2625~4500               |
| Potatoes             |                      |                         | Conventional Irrigation | 1350~3000        |                         | Sprinkler Irrigation    | 1860~3195               |
|                      |                      |                         | Sprinkler Irrigation    | 1155~2550        |                         | Micro-Irrigation        | 1755~3015               |
|                      |                      | Micro-Irrigation        | 1020~2250               | Potatoes         | Conventional Irrigation | 3150~5775               |                         |
| Fruit trees          |                      | Conventional Irrigation | 3600~5100               |                  | Sprinkler Irrigation    | 2235~4095               |                         |
|                      |                      | Sprinkler Irrigation    | 3060~4335               |                  | Micro-Irrigation        | 2115~3870               |                         |
|                      |                      | Micro-Irrigation        | 2700~3825               | Fruit trees      | Conventional Irrigation | 1350~9450               |                         |
| The Qaidam Basin     |                      | Wheat                   | Conventional Irrigation |                  | 5250~6750               | Sprinkler Irrigation    | 960~6705                |
|                      | Sprinkler Irrigation |                         | 4470~5745               |                  | Micro-Irrigation        | 900~6330                |                         |
|                      | Micro-Irrigation     |                         | 3945~5070               | Gansu Province   | Rice                    | Block Irrigation        | 6150                    |

|  |          |                         |           |  |          |                      |           |
|--|----------|-------------------------|-----------|--|----------|----------------------|-----------|
|  | Beans    | Conventional Irrigation | 4125~5775 |  | Wheat    | Border irrigation    | 3750~4050 |
|  |          | Sprinkler Irrigation    | 3510~4905 |  |          | Sprinkler Irrigation | 900~1800  |
|  |          | Micro-Irrigation        | 3090~4335 |  |          | Block Irrigation     | 4500~4950 |
|  | Potatoes | Conventional Irrigation | 4125~5775 |  | Maize    | Border irrigation    | 3900~4050 |
|  |          | Sprinkler Irrigation    | 3510~4905 |  |          | Block Irrigation     | 5250      |
|  |          | Micro-Irrigation        | 3090~4335 |  | Potatoes | Border irrigation    | 3750~4050 |
|  |          |                         |           |  |          | Furrow Irrigation    | 2400~3600 |

Note: The irrigation guarantee rate in this table is 75 %.
