# Supplementary material
Source: MDPI journal article supplement (https://www.mdpi.com/2073-4441/15/7/1396)
Supplement: s1 [file s1]

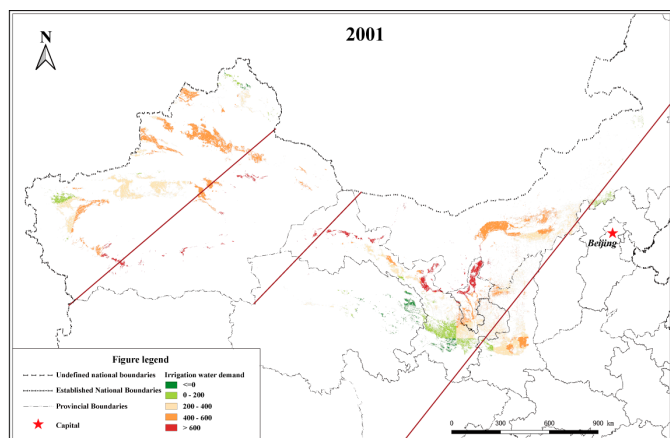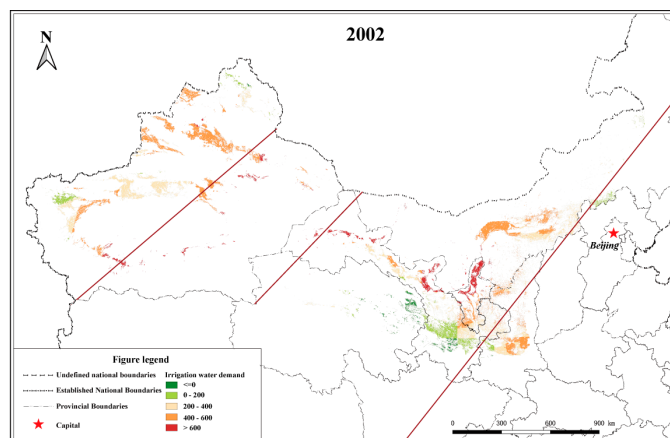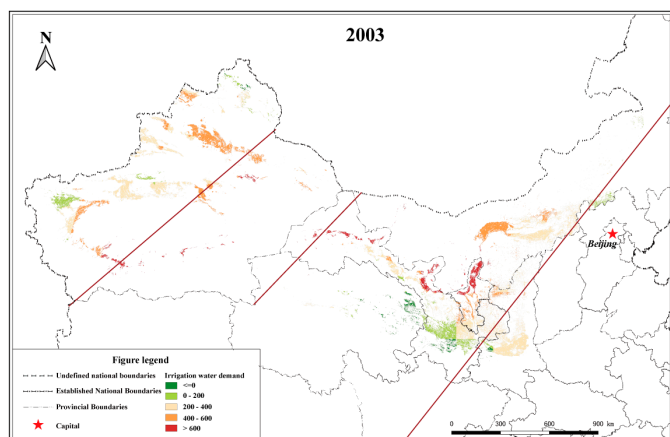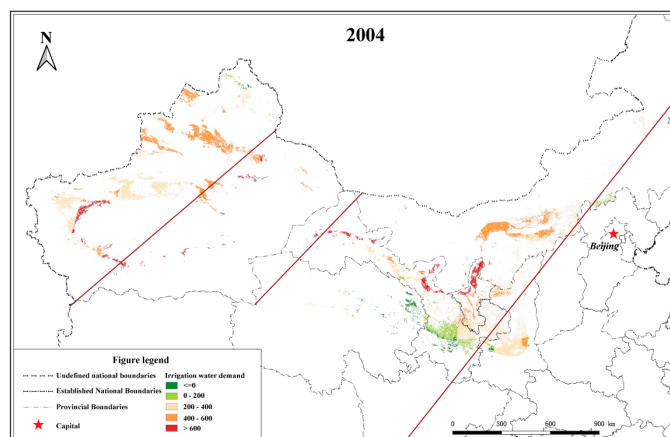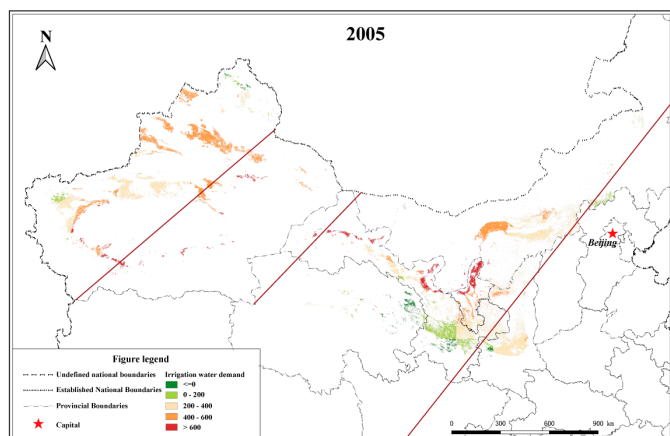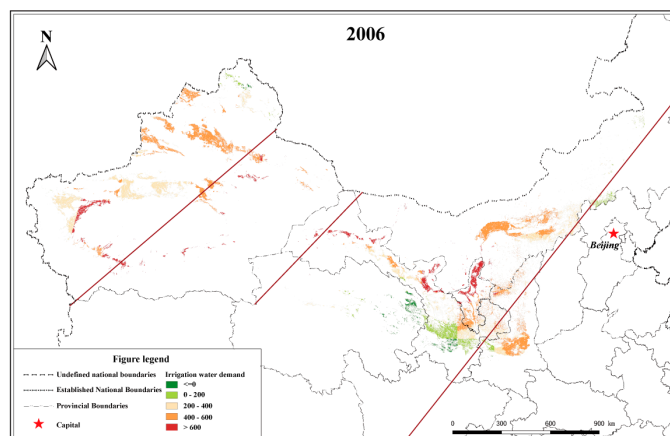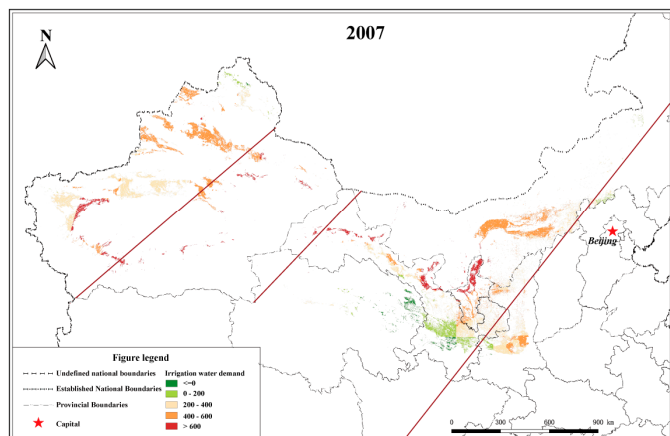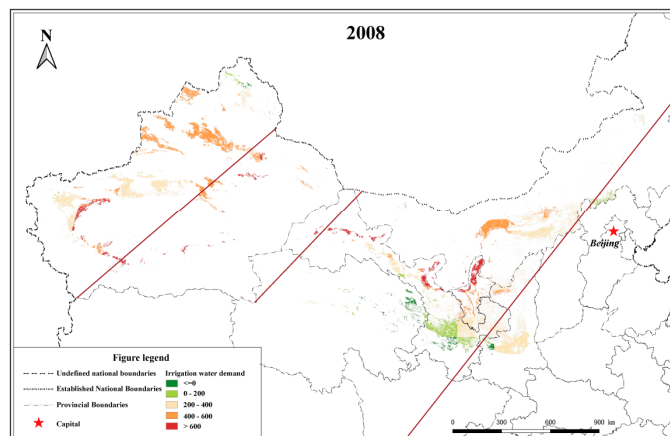

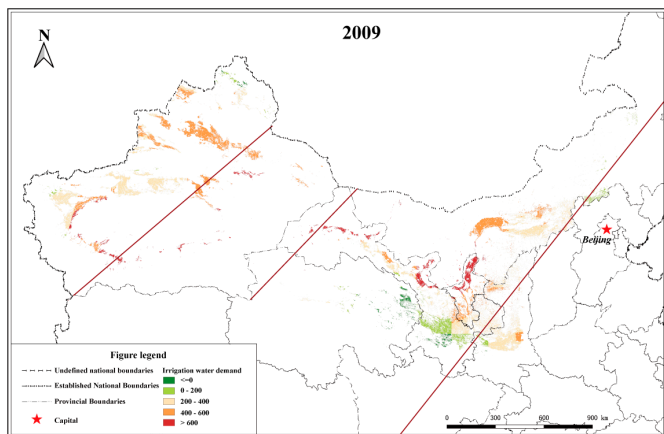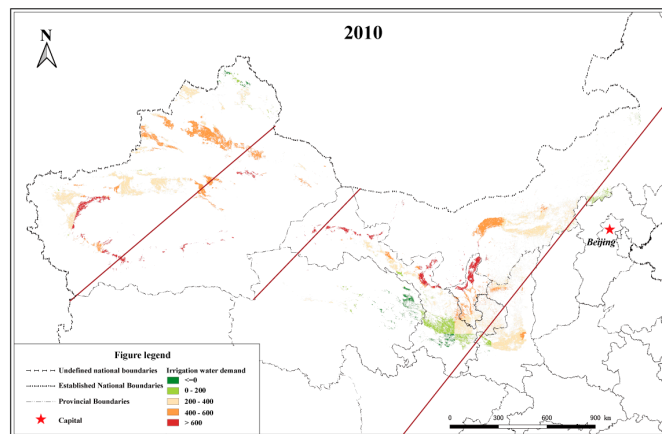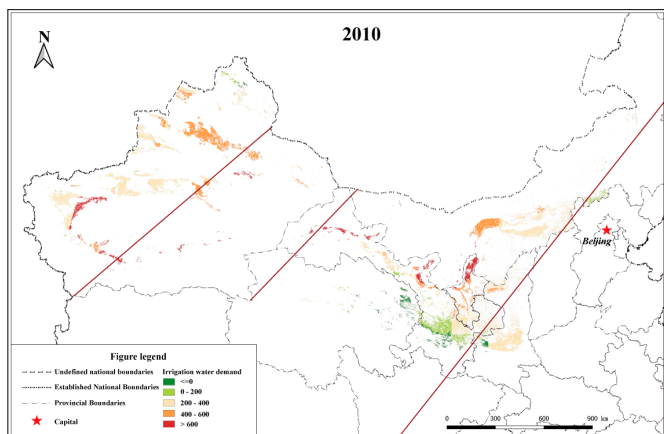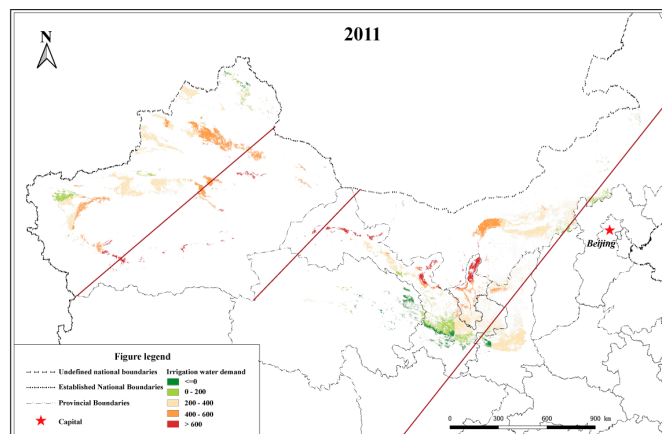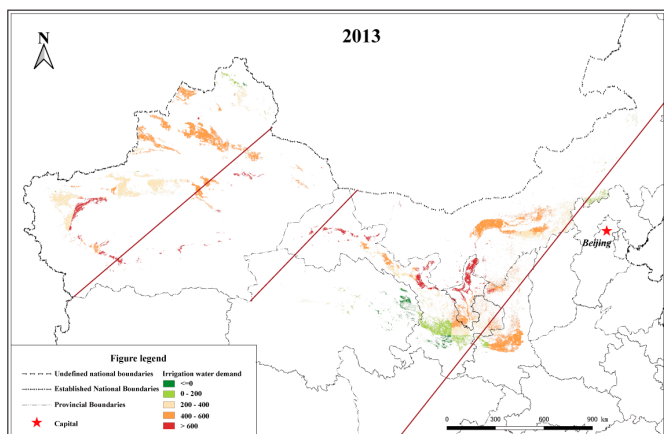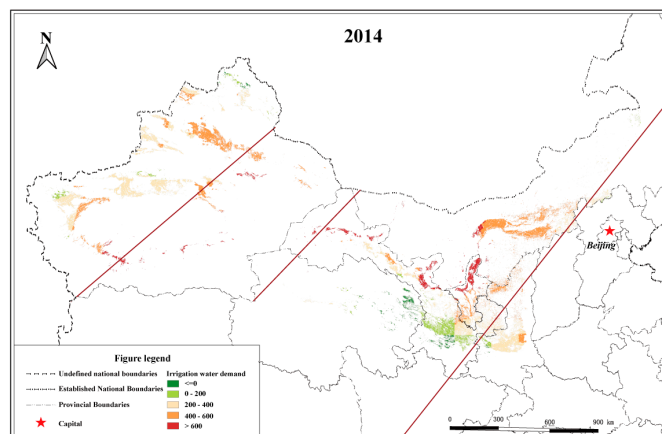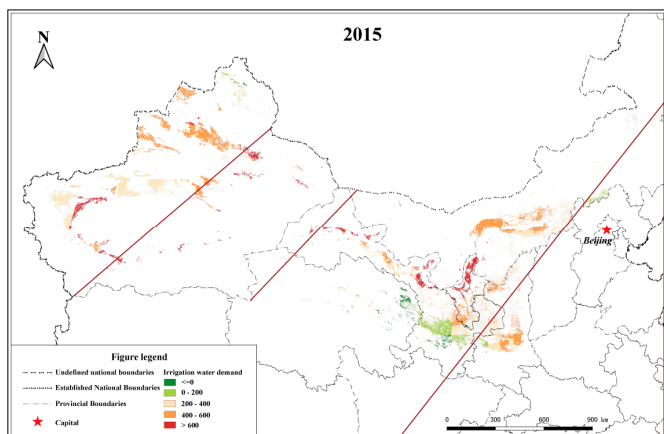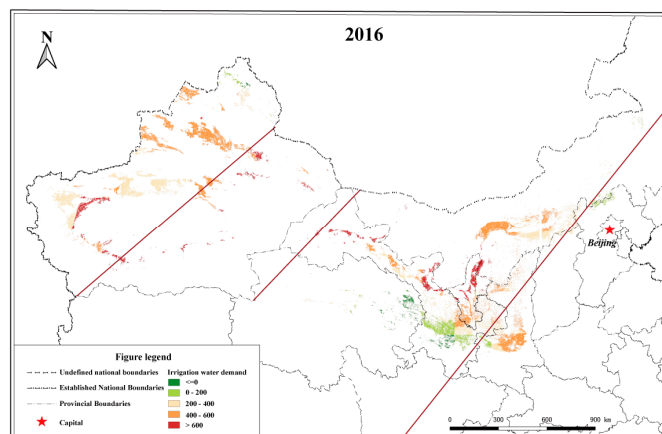

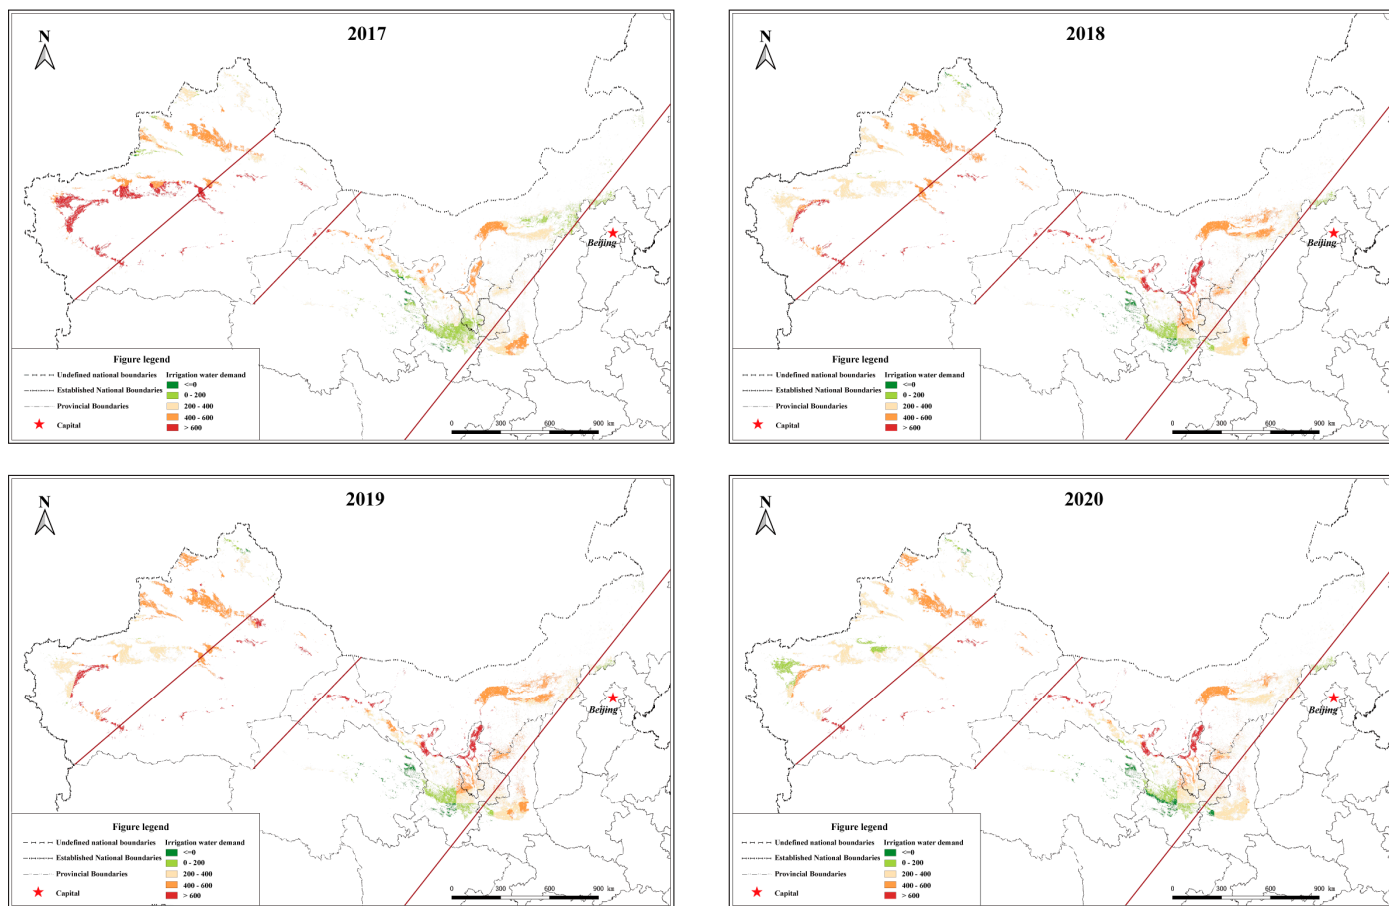

**Figure S1.** Spatial distribution of IWR from 2001 to 2020 in Northwest 'Three Water Lines' area

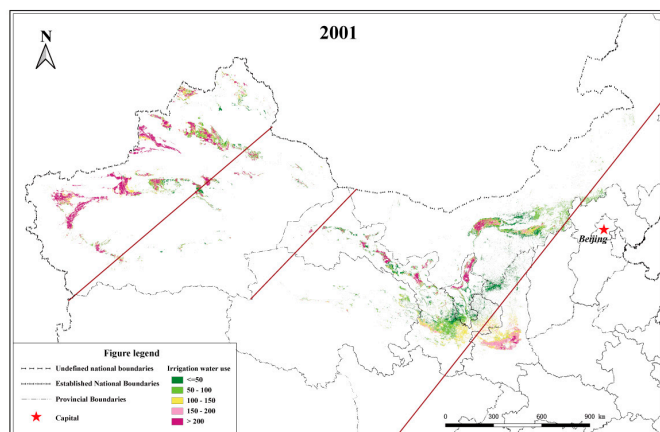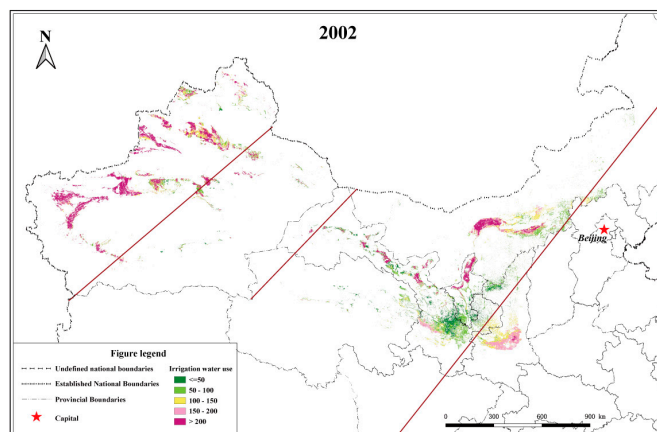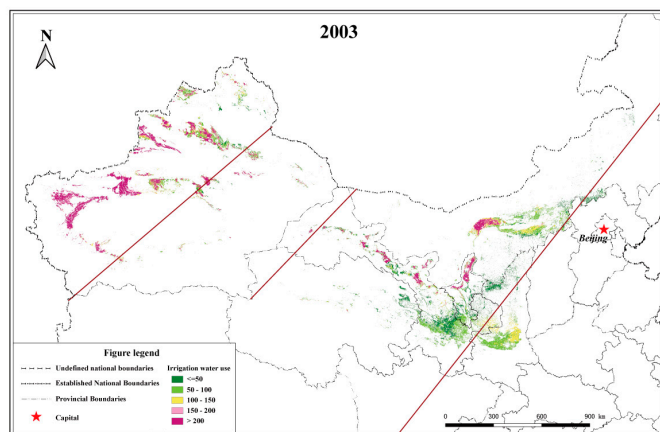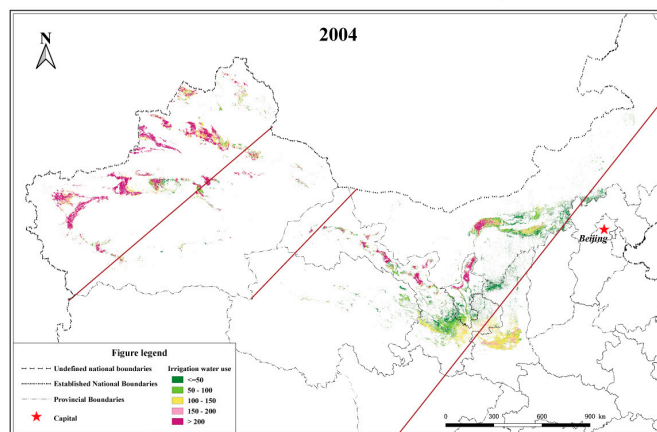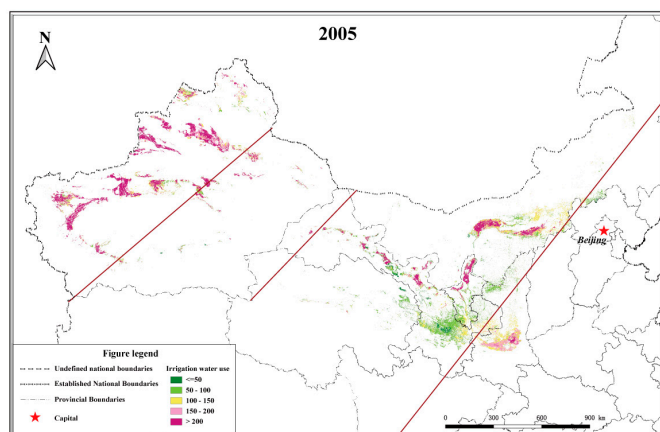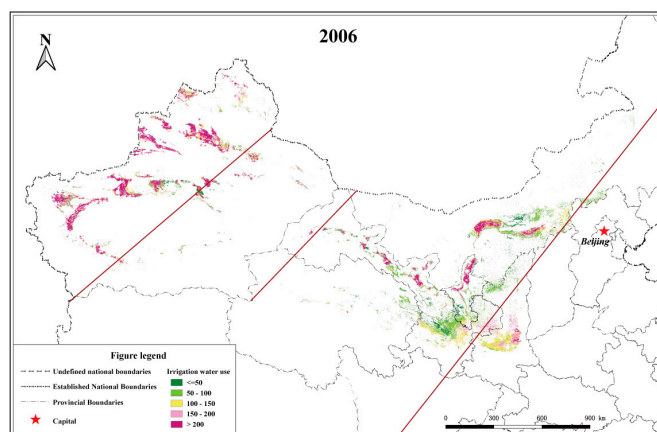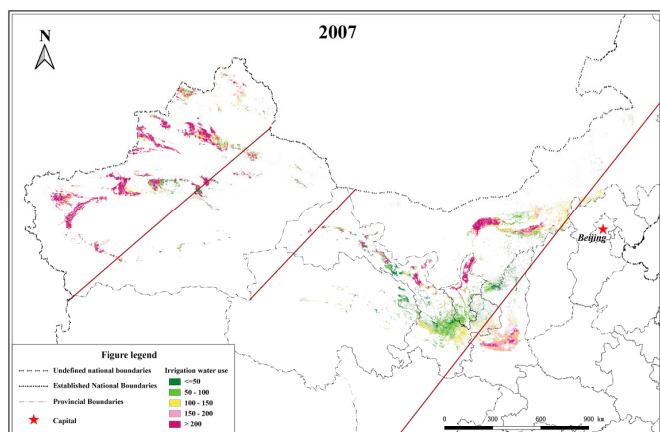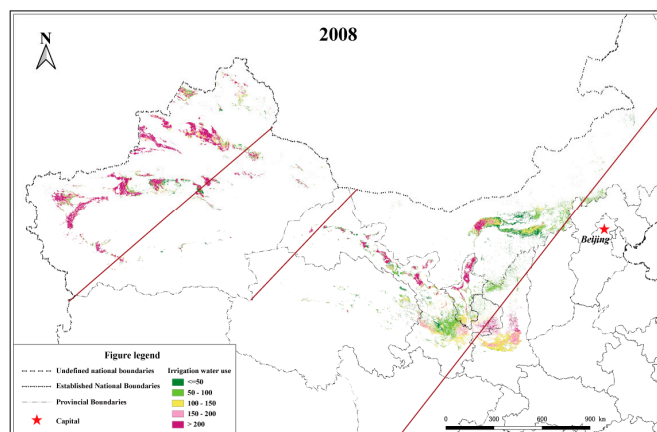



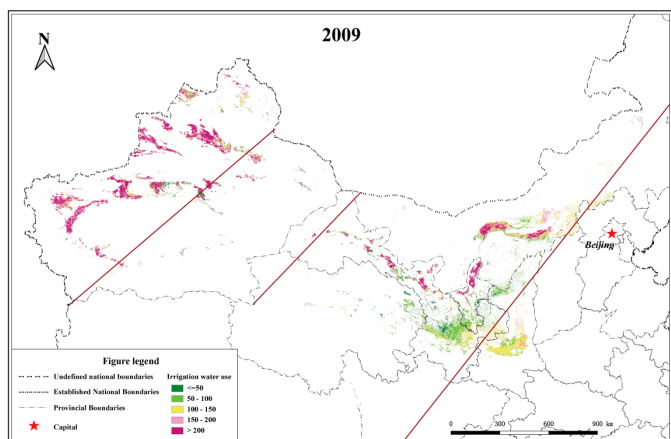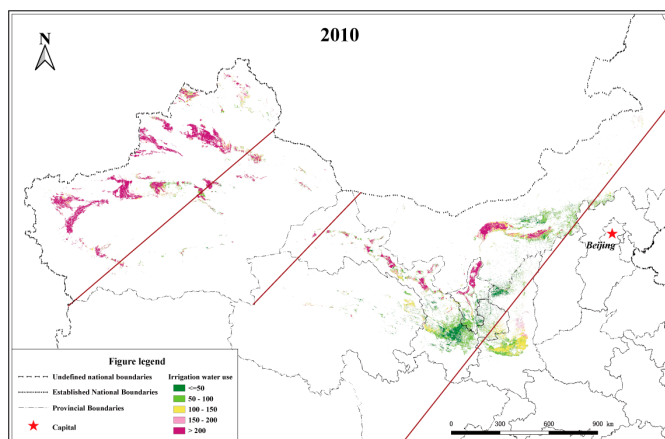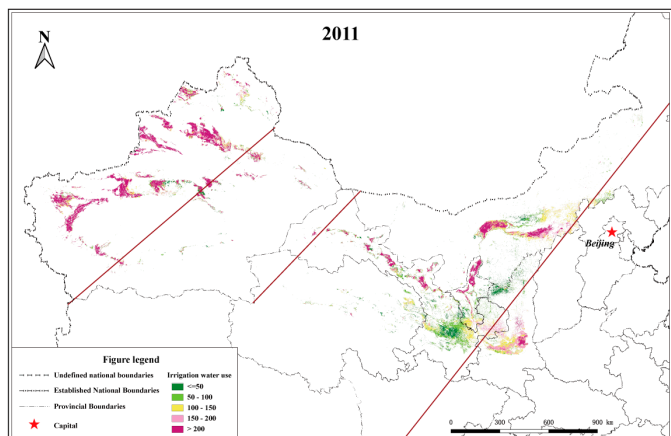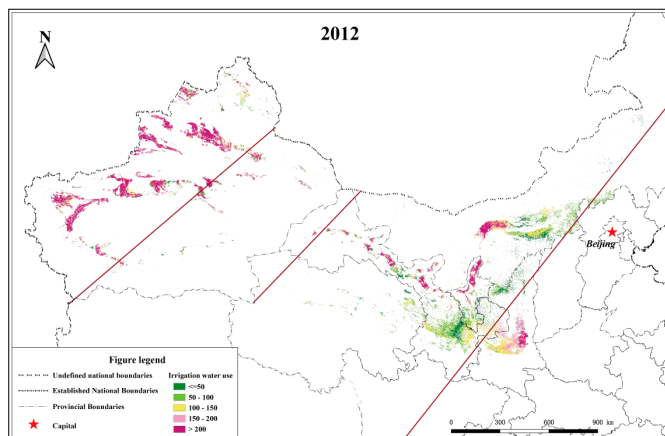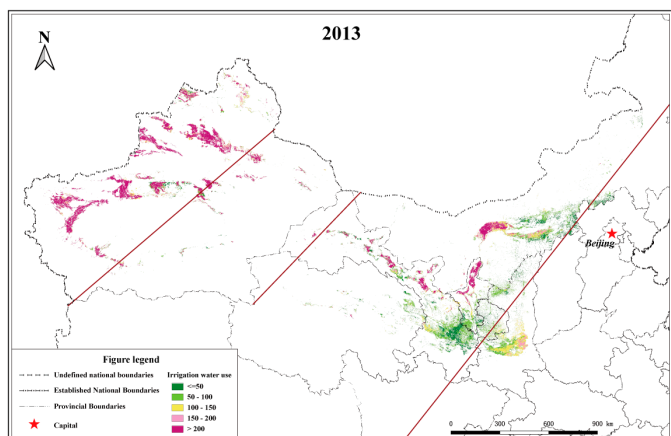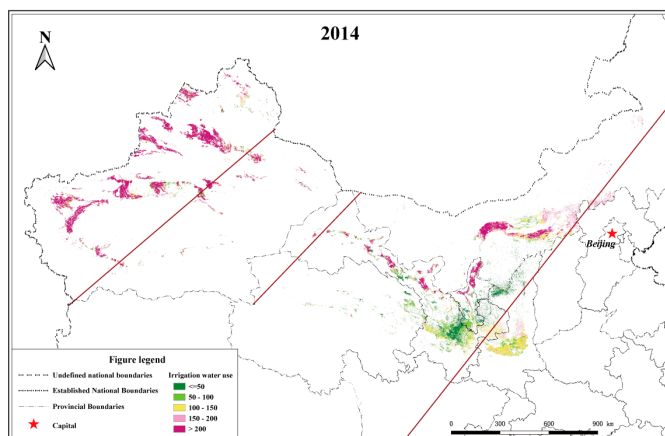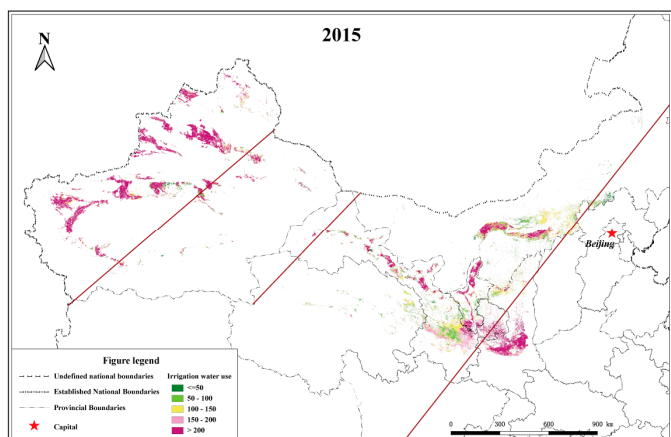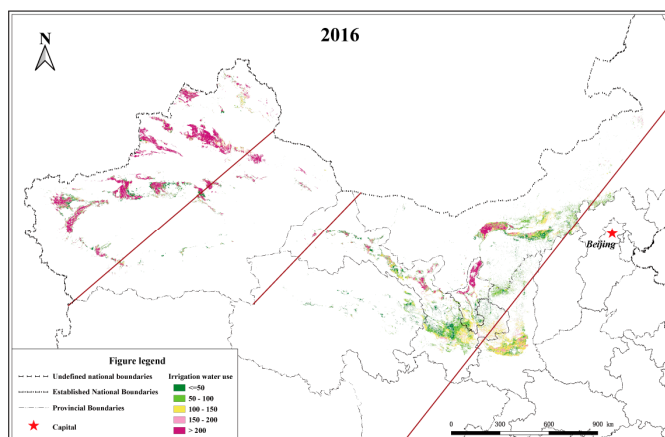

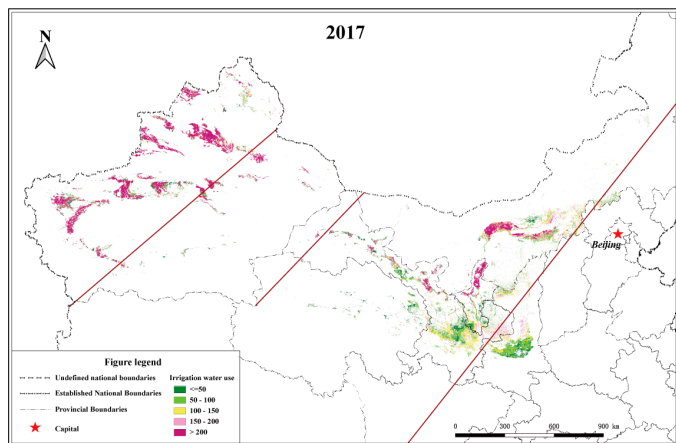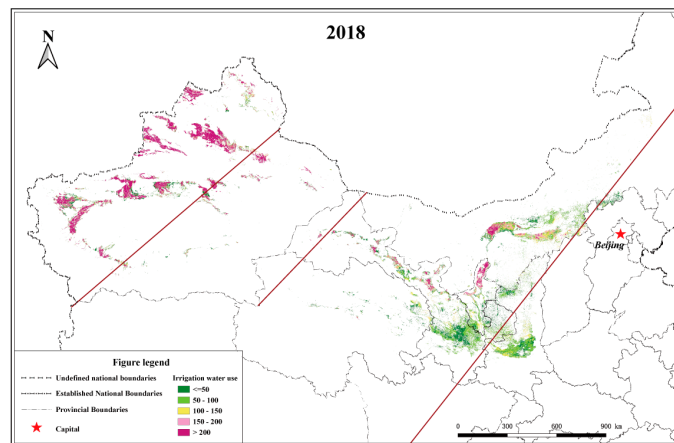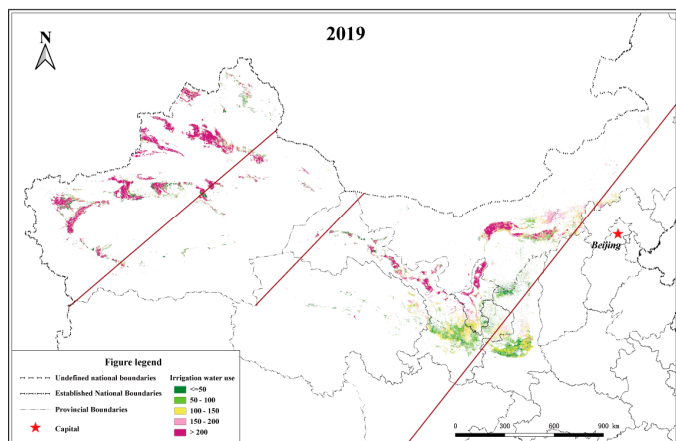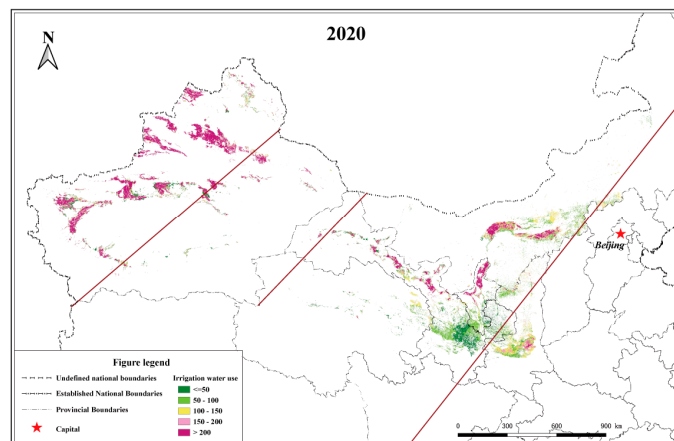

**Figure S2.** Spatial distribution of *EIW* from 2001 to 2020 in Northwest 'Three Water Lines' area

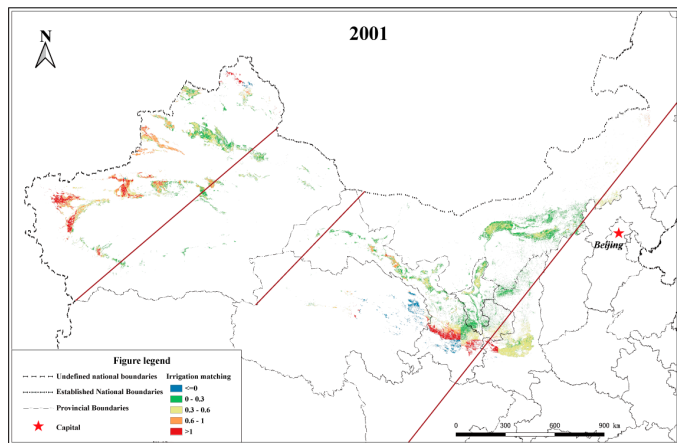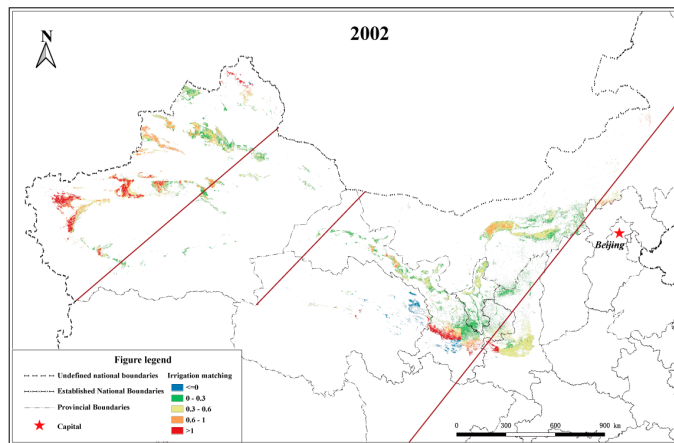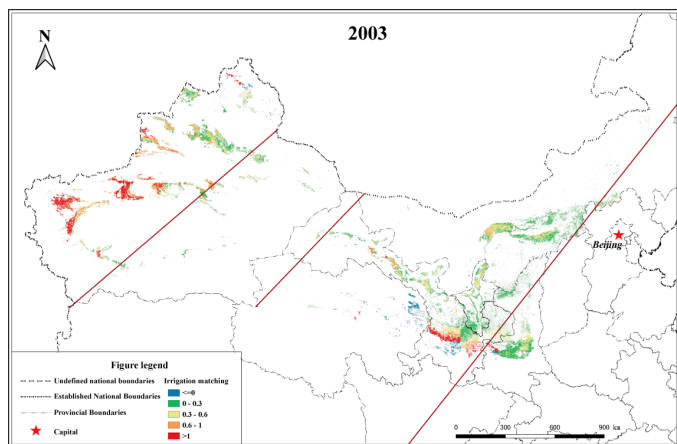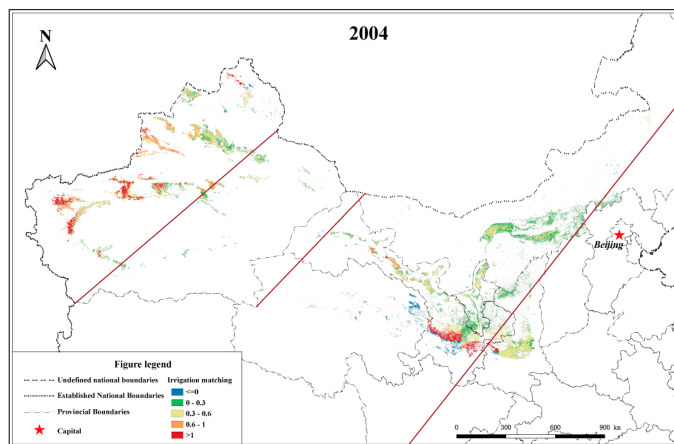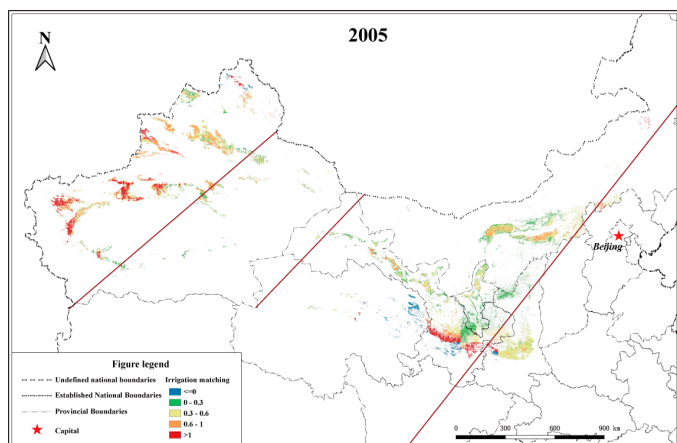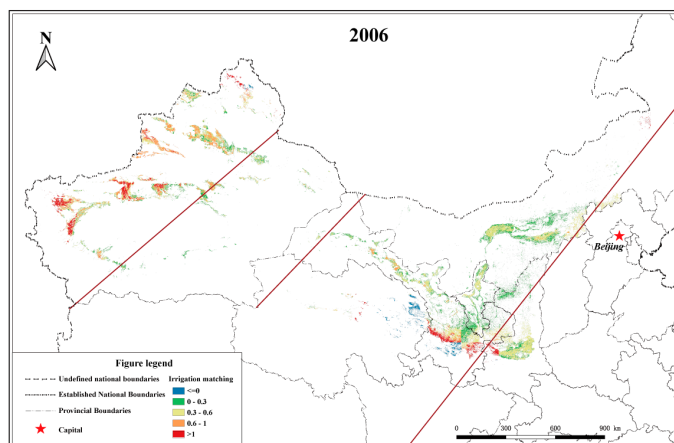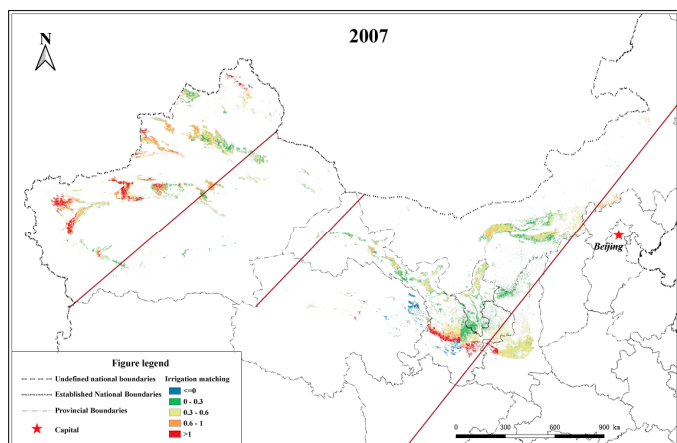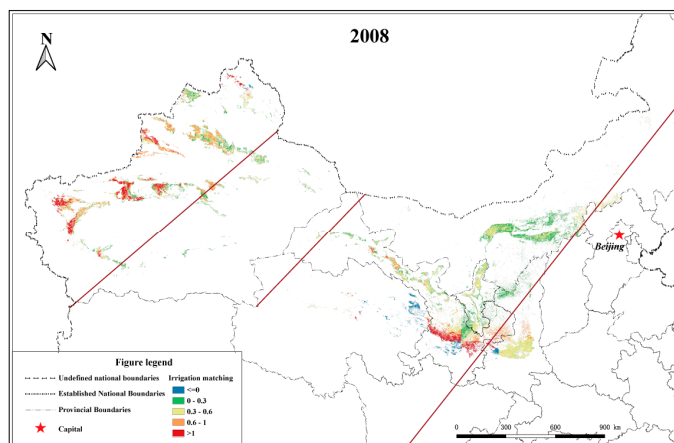

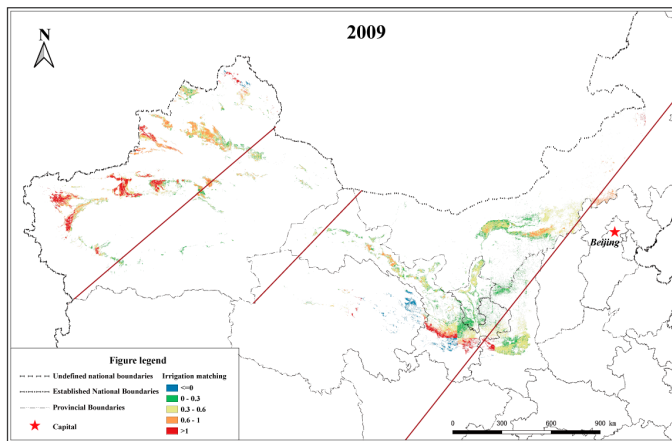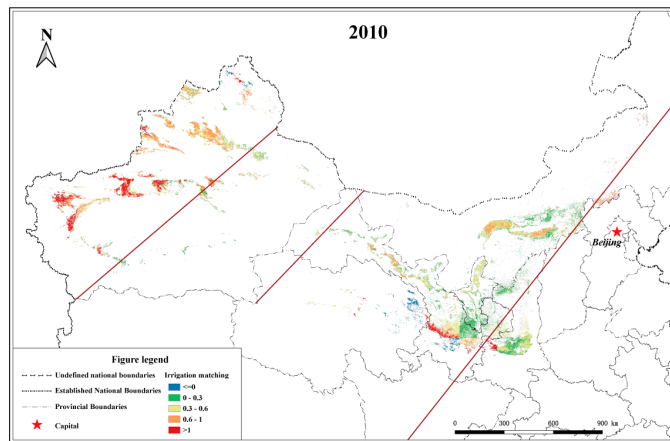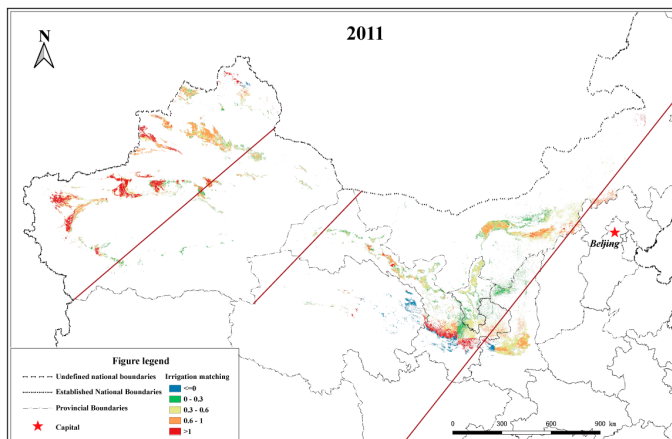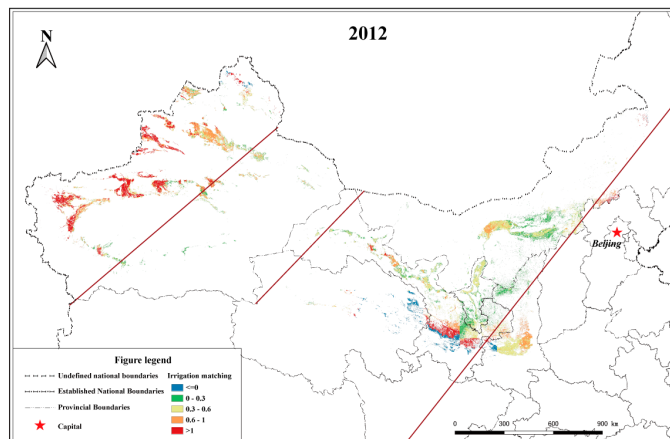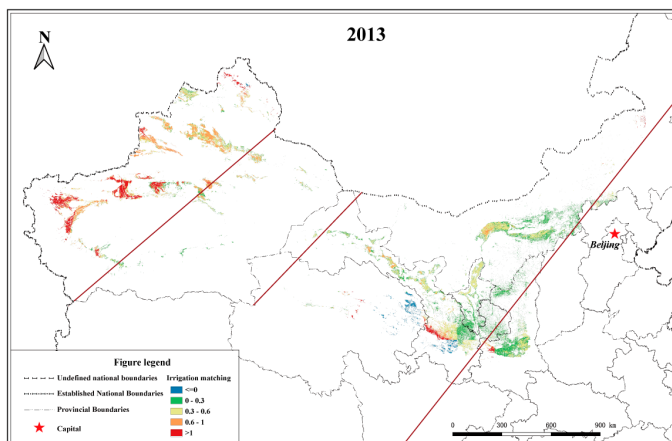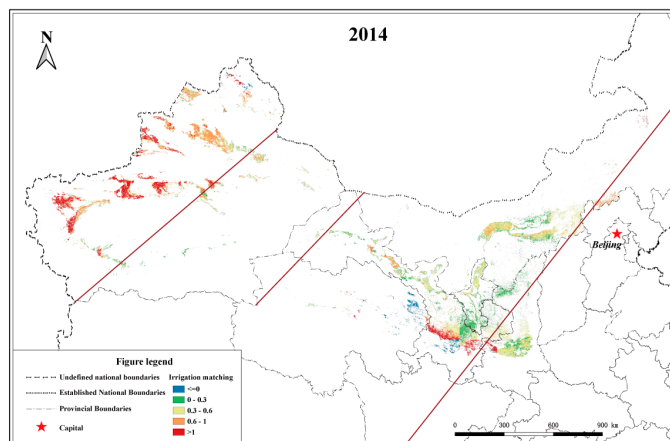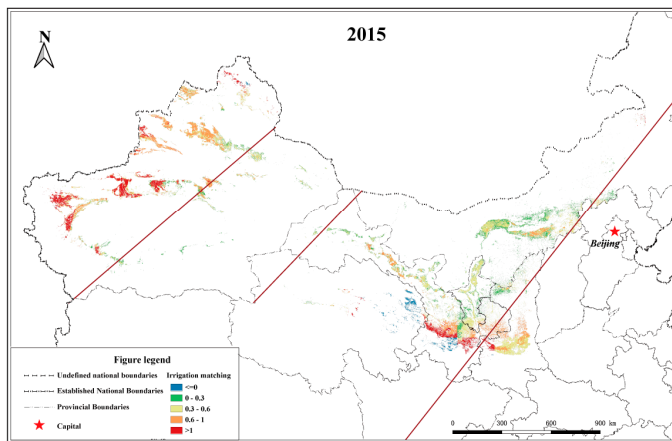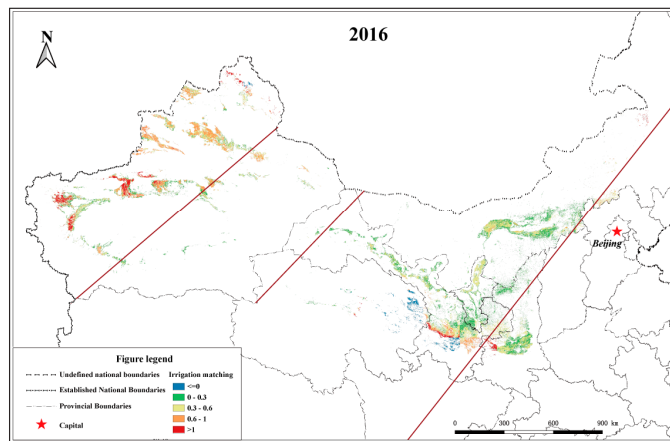



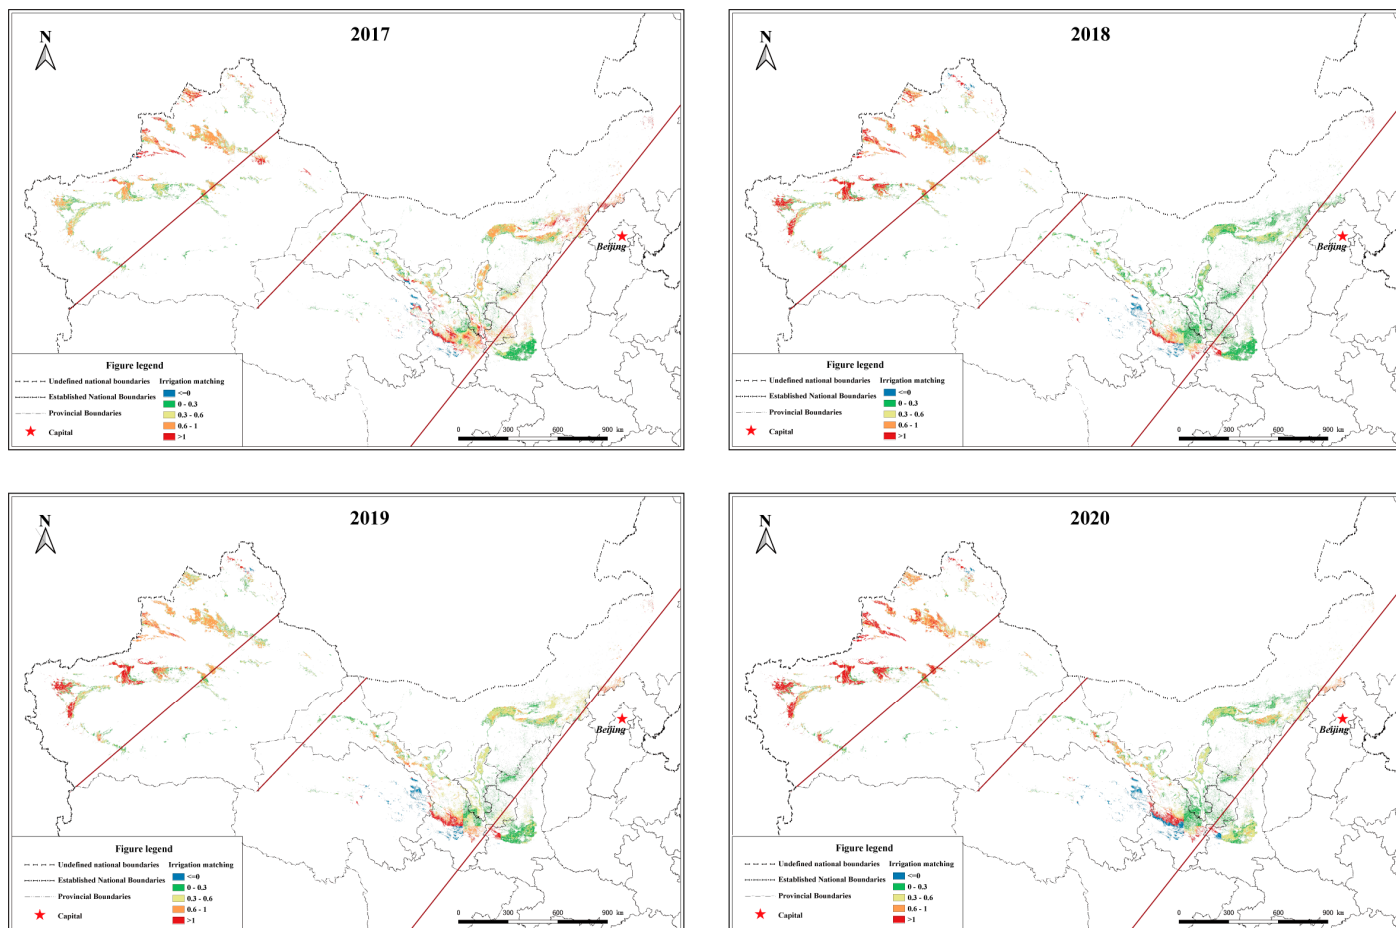

**Figure S3.** Spatial distribution of *IGCI* from 2001 to 2020 in Northwest 'Three Water Lines' area
